# Supplementary material for: Triple-Negative Breast Cancer circRNAome Reveals Hsa_circ_0072309 as a Potential Risk Biomarker
Source: MDPI journal article supplement (doi:10.3390/cancers14133280), 2022-07-05
Supplement: s1 [file s1]

# Supplementary Materials

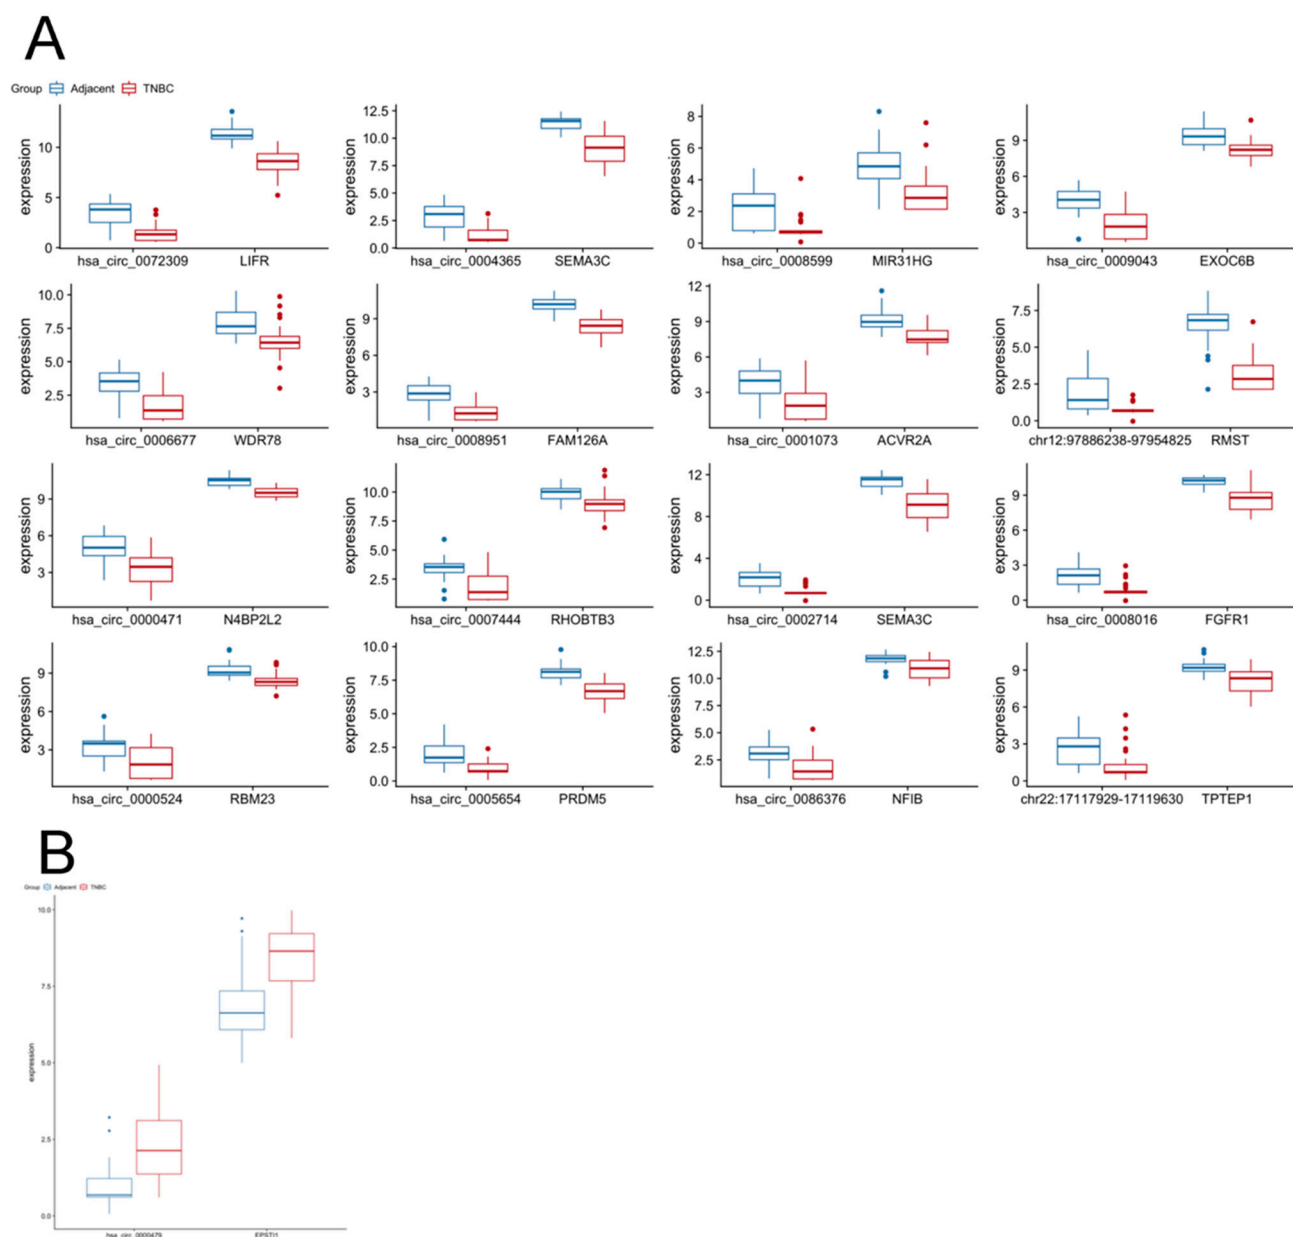

**Figure S1.** Differentially expressed circRNAs' host genes are also dysregulated and follow the same pattern as their coded circRNAs.

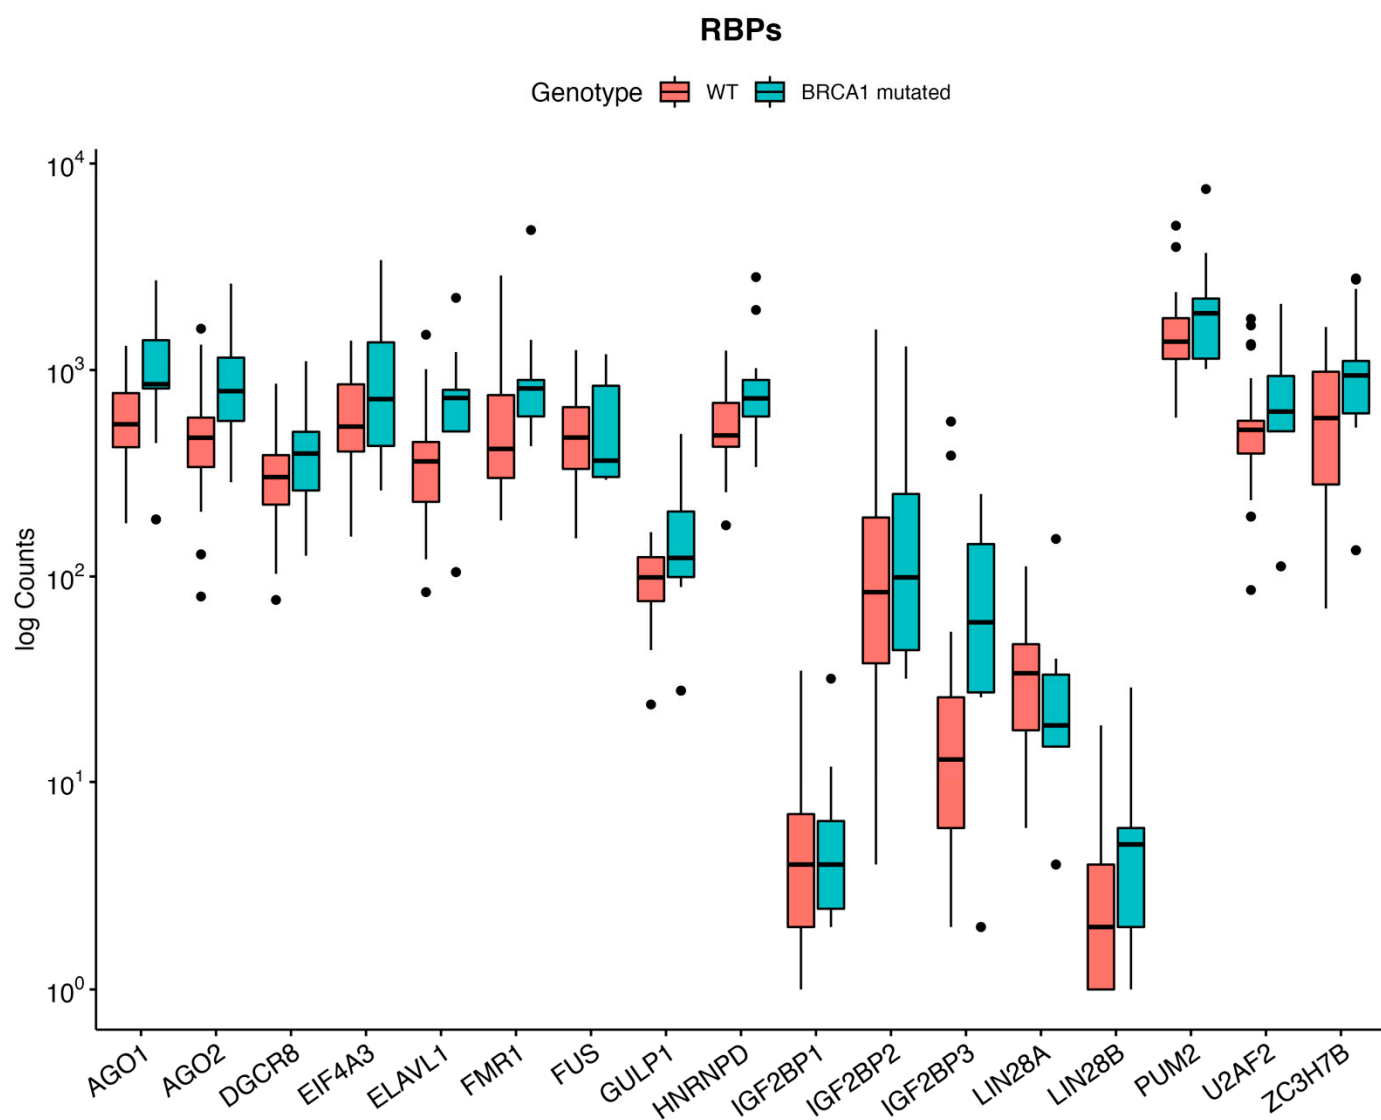

**Figure S2.** All RBPs that are predicted to interact with hsa\_circ\_0001550, circ\_0001178, circ\_0006376, circ\_0023942, circ\_0001314, circ\_0001789 and circ\_0000343 are being expressed in TNBC and when comparing Wildtype with BRCA1 mutated patients, there is no difference in expression re-garding mutational status.

**Table S1.** Information and primer sequences utilized in qRT-PCR.

| Primer               | Sequence (5'> 3')       | Type of primer            | Product size |
|----------------------|-------------------------|---------------------------|--------------|
| ACTB qPCR F          | GCACAGAGCCTCGCCTTT      | Converging                | 70 bp        |
| ACTB qPCR R          | TATCATCATCCATGGTGAGCTGG | Converging                |              |
| PUM1 qPCR F          | ACGTCCTGTCATTGGCACTA    | Converging                | 93 bp        |
| PUM1 qPCR R          | TCTCATTAATTACCTGCTGGTCT | Converging                |              |
| circ_00072309 qPCR F | GCTCGTAAAATTAGACTGACTGC | Diverging - exon junction | 70 bp        |
| circ_00072309 qPCR R | CAGGATGGTCGTTTCAAACATAC | Diverging                 |              |
| circ_0004365 qPCR F  | TCTCGGAACAGGACCAAGTT    | Diverging - exon junction | 85 bp        |
| circ_0004365 qPCR R  | GTGTTCACGTTGGGGTTGAA    | Diverging                 |              |
| circ_0008599 qPCR F  | TTCCCAGTTTCAGACCACCC    | Diverging                 | 79 bp        |
| circ_0008599 qPCR R  | GGACCAGAAACCTGCAGTGT    | Diverging - exon junction |              |
| circ_0009043 qPCR F  | GCCATGAAGCAAAATCAAGTGA  | Diverging - exon junction | 72 bp        |
| circ_0009043 qPCR R  | TGCTATTACCAGTTCCTTTCCCT | Diverging                 |              |
| circ_0006677 qPCR F  | TAGCAGAAGACCTGGAAGAACCA | Diverging                 | 70 bp        |
| circ_0006677 qPCR R  | TGTGGCATTGTTCTGTGAAACT  | Diverging - exon junction |              |
| circ_0000479 qPCR F  | AGCATCAGCAATACACAAGTGC  | Diverging - exon junction | 81 bp        |
| circ_0000479 qPCR R  | GCTCCGCAATTCTTTGTATCTC  | Diverging                 |              |

**Table S2.** Differentially expressed circRNAs in TNBC patients with BRCA1 mutations when comparing to Wildtype ones.

| Gene                  | Strand | CircRNA          | Expression Profile | BaseMean    | Log2FC       | Padj   |
|-----------------------|--------|------------------|--------------------|-------------|--------------|--------|
| <i>CLSN1</i>          | -      | hsa_circ_0000343 | Upregulated        | 2.478855444 | 3.822544815  | 0.0489 |
| <i>RAB11FIP1</i>      | -      | hsa_circ_0001789 | Upregulated        | 3.872956911 | 3.81113078   | 0.0422 |
| <i>FAM208A</i>        | -      | hsa_circ_0001314 | Upregulated        | 1.785044727 | 3.73400603   | 0.0454 |
| <i>HIBADH</i>         | -      | hsa_circ_0006773 | Upregulated        | 1.801634675 | 3.600076978  | 0.0454 |
| <i>PICALM</i>         | -      | hsa_circ_0023942 | Upregulated        | 2.140926545 | 3.401582269  | 0.0454 |
| <i>HOOK3</i>          | +      | hsa_circ_0006376 | Upregulated        | 3.35953751  | 3.204640961  | 0.0489 |
| <i>USP25</i>          | +      | hsa_circ_0001178 | Upregulated        | 4.27055334  | 2.605783073  | 0.0454 |
| <i>RARS</i>           | +      | hsa_circ_0001550 | Upregulated        | 12.40200043 | 2.146674774  | 0.0422 |
| <i>TCONS_00015354</i> | +      | hsa_circ_0001821 | Downregulated      | 5.494354843 | -2.391511722 | 0.0454 |
